# Supplementary material for: Trends in cardiometabolic risk factors in the Americas between 1980 and 2014: a pooled analysis of population-based surveys
Source: PubMed Central journal article supplement (PMC7025323; doi:10.1016/s2214-109x(19)30484-x), 2019-12-12

# THE LANCET

## Global Health

### Supplementary appendix

This appendix formed part of the original submission and has been peer reviewed.  
We post it as supplied by the authors.

Supplement to: NCD Risk Factor Collaboration (NCD-RisC)—Americas Working Group.  
Trends in cardiometabolic risk factors in the Americas between 1980 and 2014:  
a pooled analysis of population-based surveys. *Lancet Glob Health* 2020; **8**: e123–33.

## Transitions of cardio-metabolic risk factors in the Americas between 1980 and 2014

NCD Risk Factor Collaboration (NCD-RisC) – Americas Working Group

|                                                                                                                                                                                                                                                                                |    |
|--------------------------------------------------------------------------------------------------------------------------------------------------------------------------------------------------------------------------------------------------------------------------------|----|
| Appendix 1: Data sources, data management and statistical analysis .....                                                                                                                                                                                                       | 2  |
| Table S1 – Number of data sources by country, sub-region and risk factor .....                                                                                                                                                                                                 | 7  |
| Table S2 - Age-standardised prevalence of obesity (%), prevalence of raised blood pressure (%), and prevalence of diabetes (%) by sub-region in 1980 (95% CrI provided in brackets).....                                                                                       | 10 |
| Table S3 - Age-standardised mean body mass index (BMI, kg/m <sup>2</sup> ), prevalence of obesity (%), mean systolic blood pressure (mmHg), prevalence of raised blood pressure (%), and prevalence of diabetes (%) by sub-region in 2014 (95% CrI provided in brackets) ..... | 11 |
| Table S4 – Prevalence of obesity (%), prevalence of raised blood pressure (%), and prevalence of diabetes (%), for men and women in 1980 and 2014, as well as the ratio of prevalence between 2014 and 1980 .....                                                              | 12 |
| Table S5 - Age-standardised mean body mass index (BMI, kg/m <sup>2</sup> ), prevalence of obesity (%), mean systolic blood pressure (mmHg), prevalence of raised blood pressure (%), and prevalence of diabetes (%) by country in 2014 (95% CrI provided in brackets).....     | 13 |
| Figure S1 – Mean body mass index and systolic blood pressure by sub-regions in men .....                                                                                                                                                                                       | 20 |
| Figure S2 – Mean body mass index and systolic blood pressure by sub-regions in women.....                                                                                                                                                                                      | 21 |
| Figure S3 – Heatmap of age-standardised prevalence of obesity, raised blood pressure (RBP), and diabetes (DM) by country in (A) men and (B) women in 1980. Countries ranked by prevalence of obesity .....                                                                     | 22 |
| Figure S4 – Age standardised prevalence of obesity vs. age standardised prevalence of raised blood pressure and age standardised prevalence of diabetes by sex, (A) 1980 and (B) 2014 .....                                                                                    | 23 |

## Appendix 1: Data sources, data management and statistical analysis

We used a database of population-based data on cardiometabolic risk factors collated by the NCD Risk Factor Collaboration (NCD-RisC), a worldwide network of health researchers and practitioners whose aim is to document systematically the worldwide trends and variations in non-communicable disease (NCD) risk factors. The database was collated through multiple routes for identifying and accessing data. We accessed publicly available population-based multi-country and national measurement surveys (e.g., Demographic and Health Surveys (DHS), Global School-based student Health Surveys (GSHS), and surveys identified via the Inter-University Consortium for Political and Social Research and the European Health Interview & Health Examination Surveys Database) as well as the World Health Organization (WHO) STEPwise approach to Surveillance (STEPS) surveys. We requested, via WHO and its regional and country offices, from ministries of health and other national health and statistical agencies to identify and access population-based surveys. Requests were also sent via the World Heart Federation to its national partners. We made a similar request to the co-authors of an earlier pooled analysis of cardiometabolic risk factors,<sup>1-4</sup> and invited them to reanalyse data from their studies and join NCD-RisC. Finally, to identify major sources not accessed through the above routes, we searched and reviewed published and invited all eligible studies to join NCD-RisC.<sup>5-7</sup>

Anonymised individual record data from sources included in NCD-RisC were reanalysed by the Pooled Analysis and Writing Group or by data holders according to a common protocol. Within each survey, we included participants aged five years and older who were not pregnant. We dropped participants with implausible values:

1. body mass index (BMI) levels (defined as BMI <7 kg/m<sup>2</sup> or BMI >80 kg/m<sup>2</sup> for children and adolescents and BMI <10 kg/m<sup>2</sup> or BMI >80 kg/m<sup>2</sup> for adults) or with implausible height or weight values (defined as height <80 cm, height >250 cm, weight <8 kg or weight >300 kg) (<0.2% of all subjects).
2. FPG (defined as FPG <2.5 mmol/L or FPG >30 mmol/L; <0.5% of all FPG data), 2hOGTT (2hOGTT <2 mmol/L or 2hOGTT >30 mmol/L; <0.2% of all 2hOGTT data), or HbA1c (HbA1c <3% or HbA1c >18%; <0.1% of all HbA1c data).
3. SBP (defined as SBP <70 mmHg or SBP >270 mmHg; 0.09% of all SBP data) or DBP (DBP <50 mmHg or DBP >150 mmHg; 0.07% of all DBP data).

We calculated:

1. Mean BMI, prevalence of a comprehensive set of BMI categories, and associated standard errors by sex and age group. For adults, we analysed prevalence in the following BMI ranges: <math> <18.5 \text{ kg/m}^2 </math>, <math> 18.5 \text{ kg/m}^2 </math> to <math> <20 \text{ kg/m}^2 </math>, <math> 20 \text{ kg/m}^2 </math> to <math> <25 \text{ kg/m}^2 </math>, <math> 25 \text{ kg/m}^2 </math> to <math> <30 \text{ kg/m}^2 </math>, <math> 30 \text{ kg/m}^2 </math> to <math> <35 \text{ kg/m}^2 </math>, <math> 35 \text{ kg/m}^2 </math> to <math> <40 \text{ kg/m}^2 </math>, and <math> \geq 40 \text{ kg/m}^2 </math>.
2. Mean SBP, mean DBP and prevalence of raised blood pressure defined as systolic blood pressure (SBP)  $\geq 140$  mmHg or diastolic blood pressure (DBP)  $\geq 90$  mmHg, and associated standard errors and sample sizes, by sex and age group (18-19 years, 20-29 years, followed by 10-year age groups and 80+ years). The NCD-RisC has made estimates for DBP itself; however, given that SBP and DBP are strongly correlated, we chose to report only SBP.
3. Prevalence of diabetes defined as FPG fasting plasma glucose  $\geq 7.0$  mmol/l, history of diabetes, or diabetes treatment in adults aged 18 years and older.

All analyses incorporated appropriate sample weights and complex survey design in calculating age-sex-specific means and prevalence, when applicable. To ensure summaries were prepared according to the study protocol, the Pooled Analysis and Writing Group provided computer code to NCD-RisC members who requested assistance. All submitted data were checked by at least two independent members of the Pooled Analysis and Writing Group. Questions and clarifications were discussed with NCD-RisC members and resolved before data were incorporated in the database.

Finally, we obtained data not accessed through the above routes by extracting from published reports of all additional national health surveys identified through the above-described strategies. Data were extracted from published reports only when reported by sex and in age groups no wider than 20 years. We also used data from a previous pooling study<sup>1</sup> when such data had not been accessed through the above routes.

NCD-RisC database is continuously updated through the above routes and through periodic requests to NCD-RisC members to help identify new data sources. In this paper, we used data from the NCD-RisC database for years 1975 to 2016. In this work we report estimates for adults aged 18+ years for blood pressure and diabetes, and adults aged 20+ for body mass index.

### *Data inclusion and exclusion*

Data sources were included in NCD-RisC database if:

- measured data on height, weight; measured data on systolic blood pressure (SBP) and/or diastolic blood pressure (DBP); or measured data on fasting glucose, 2-h plasma glucose in an oral glucose tolerance test (2hOGTT) or haemoglobin A1c (HbA1c) were available;
- study participants were five years of age and older for anthropometric measurements and ten years of age and older for blood pressure and diabetes;
- data were collected using a probabilistic sampling method with a defined sampling frame;
- data were from population samples at the national, sub-national, or community level;
- data were collected in or after 1950.

We excluded all data sources that were solely based on self-reported measurements. We also excluded data sources on population subgroups whose specific measurements may differ systematically from the general population, including:

- studies that had included or excluded people based on their health status or cardiovascular risk;
- studies whose participants were only ethnic minorities;
- specific educational, occupational, or socioeconomic subgroups, with the exception noted below;
- those recruited through health facilities, with the exception noted below; and
- only for anthropometric measurements, women aged 15-19 years in surveys which sampled only ever-married women or measured height and weight only among mothers.

We used school-based data in countries, and in age-sex groups, with school enrolment of 70% or higher. We used data whose sampling frame was health insurance schemes in countries where at least 80% of the population were insured. Finally, we used data collected through general practice and primary care system in high-income countries with universal insurance, because contact with the primary care systems tends to be at least as good as response rates for population-based surveys.

### *Data management*

For each data source accessed through the primary and secondary data access process, we recorded

the available information about the study population, period of measurement, sampling approach, and

measurement methods. The information about study population was used to establish that each data source was population-based, and to assess whether it covered the whole country, multiple sub-national regions, or one or a small number of communities, and whether it was rural, urban, or combined.

We carefully checked all data sources in terms of how they met our inclusion and exclusion criteria. We identified duplicate data sources by comparing studies from the same country and year. Additionally, NCD-RisC members received the list of all data sources in the database and were asked to ensure that the included data from their country met the inclusion criteria and that there were no duplicates.

### *Statistical analysis*

The model is fitted using a Markov chain Monte Carlo sampler coded in R, which uses a combination of Metropolis-Hastings and Gibbs updates. To ensure that the sampler has converged to the posterior distribution, we run 55,000 iterations and discard 5,000 to give 50,000 iterations. We then thin the chains, to give 5,000 iterations for each chain. The 20 chains are then combined, and further thinning is carried out to give the final 5,000 samples.

### *References*

1. Finucane MM, Stevens GA, Cowan MJ, et al. National, regional, and global trends in body-mass index since 1980: systematic analysis of health examination surveys and epidemiological studies with 960 country-years and 9.1 million participants. *Lancet* 2011; **377**(9765): 557-67.
2. Danaei G, Finucane MM, Lin JK, et al. National, regional, and global trends in systolic blood pressure since 1980: systematic analysis of health examination surveys and epidemiological studies with 786 country-years and 5.4 million participants. *Lancet* 2011; **377**(9765): 568-77.
3. Danaei G, Finucane MM, Lu Y, et al. National, regional, and global trends in fasting plasma glucose and diabetes prevalence since 1980: systematic analysis of health examination surveys and epidemiological studies with 370 country-years and 2.7 million participants. *Lancet* 2011; **378**(9785): 31-40.
4. Farzadfar F, Finucane MM, Danaei G, et al. National, regional, and global trends in serum total cholesterol since 1980: systematic analysis of health examination surveys and epidemiological studies with 321 country-years and 3.0 million participants. *Lancet* 2011; **377**(9765): 578-86.

5. NCD Risk Factor Collaboration (NCD-RisC). Trends in adult body-mass index in 200 countries from 1975 to 2014: a pooled analysis of 1698 population-based measurement studies with 19.2 million participants. *Lancet (London, England)* 2016; **387**(10026): 1377-96.
6. NCD Risk Factor Collaboration (NCD-RisC). Worldwide trends in diabetes since 1980: a pooled analysis of 751 population-based studies with 4.4 million participants. *Lancet (London, England)* 2016; **387**(10027): 1513-30.
7. NCD Risk Factor Collaboration (NCD-RisC). Worldwide trends in blood pressure from 1975 to 2015: a pooled analysis of 1479 population-based measurement studies with 19.1 million participants. *Lancet (London, England)* 2017; **389**(10064): 37-55.



**Table S1 – Number of data sources by country, sub-region and risk factor**

| Country                  | Number of surveys |                |          | Region                |
|--------------------------|-------------------|----------------|----------|-----------------------|
|                          | BMI               | Blood Pressure | Diabetes |                       |
| Canada                   | 17                | 10             | 2        | North America         |
| United States of America | 35                | 96             | 32       |                       |
| Costa Rica               | 8                 | 7              | 7        | Central Latin America |
| El Salvador              | 3                 | 1              | 1        |                       |
| Guatemala                | 7                 | 4              | 2        |                       |
| Honduras                 | 4                 | 1              | 1        |                       |
| Mexico                   | 20                | 13             | 4        |                       |
| Nicaragua                | 5                 | 1              | 1        |                       |
| Panama                   | 2                 | 1              | 1        |                       |
| Antigua y Barbuda        | 0                 | 0              | 0        |                       |
| Bahamas                  | 0                 | 0              | 0        |                       |
| Barbados                 | 5                 | 2              | 4        |                       |
| Belize                   | 1                 | 1              | 1        |                       |
| Bermuda                  | 0                 | 0              | 0        |                       |

|                                  |    |    |   |                      |
|----------------------------------|----|----|---|----------------------|
| Dominica                         | 1  | 1  | 1 |                      |
| Grenada                          | 1  | 1  | 0 |                      |
| Guyana                           | 1  | 0  | 0 |                      |
| Jamaica                          | 5  | 3  | 6 |                      |
| Puerto Rico                      | 4  | 2  | 1 |                      |
| Saint Kitts and Navis            | 1  | 1  | 0 |                      |
| Saint Lucia                      | 3  | 2  | 0 |                      |
| Saint Vincent and the Grenadines | 0  | 0  | 0 |                      |
| Trinidad and Tobago              | 2  | 2  | 0 |                      |
| Cuba                             | 5  | 3  | 3 |                      |
| Dominican Republic               | 5  | 2  | 1 |                      |
| Haiti                            | 4  | 0  | 0 |                      |
| Suriname                         | 1  | 0  | 0 |                      |
| Bolivia                          | 5  | 1  | 1 | Andean Latin America |
| Colombia                         | 12 | 6  | 5 |                      |
| Ecuador                          | 4  | 2  | 1 |                      |
| Peru                             | 20 | 11 | 6 |                      |
| Venezuela                        | 8  | 7  | 6 |                      |

|           |    |    |   |                        |
|-----------|----|----|---|------------------------|
| Argentina | 9  | 6  | 2 | Southern Latin America |
| Brazil    | 33 | 27 | 9 |                        |
| Chile     | 10 | 6  | 7 |                        |
| Paraguay  | 0  | 0  | 1 |                        |
| Uruguay   | 4  | 3  | 2 |                        |

**Table S2 - Age-standardised prevalence of obesity (%), prevalence of raised blood pressure (%), and prevalence of diabetes (%) by sub-region in 1980 (95% CrI provided in brackets)**

| Region                           | Obesity men        | Obesity women       | Raised blood pressure men | Raised blood pressure women | Diabetes men      | Diabetes women    |
|----------------------------------|--------------------|---------------------|---------------------------|-----------------------------|-------------------|-------------------|
| Andean Latin America             | 4.92 (3.01-7.69)   | 12.12 (8.34-16.37)  | 28.92 (21.40-37.00)       | 26.70 (19.74-34.93)         | 4.96 (2.13-10.04) | 5.74 (2.55-11.16) |
| Caribbean (non-English-speaking) | 3.94 (2.18-6.31)   | 12.18 (8.21-16.95)  | 31.76 (23.35-40.42)       | 28.97 (21.29-37.89)         | 4.21 (1.61-8.92)  | 5.11 (2.03-10.44) |
| Central Latin America            | 6.69 (4.04-10.26)  | 14.48 (9.91-19.76)  | 28.84 (20.54-37.42)       | 28.86 (20.94-38.17)         | 5.97 (2.32-12.14) | 6.13 (2.44-12.26) |
| Caribbean (English-speaking)     | 4.76 (2.69-7.53)   | 14.92 (10.41-20.13) | 30.73 (22.99-39.05)       | 26.95 (19.61-35.51)         | 5.20 (2.09-10.39) | 6.40 (2.65-12.75) |
| North America                    | 12.38 (9.35-16.03) | 15.47 (12.17-19.01) | 27.58 (22.25-33.20)       | 19.92 (15.75-24.38)         | 4.70 (2.25-8.52)  | 4.29 (2.09-7.94)  |
| Southern Latin America           | 6.19 (3.96-9.12)   | 11.46 (7.95-15.71)  | 37.41 (28.61-46.28)       | 33.53 (25.68-42.47)         | 5.60(2.21-11.50)  | 5.87 (2.38-11.51) |

**Table S3 - Age-standardised mean body mass index (BMI, kg/m<sup>2</sup>), prevalence of obesity (%), mean systolic blood pressure (mmHg), prevalence of raised blood pressure (%), and prevalence of diabetes (%) by sub-region in 2014 (95% CrI provided in brackets)**

| Region                           | BMI men                | BMI women              | Obesity men            | Obesity women          | Systolic blood pressure men | Systolic blood pressure women | Raised blood pressure men | Raised blood pressure women | Diabetes men          | Diabetes women        |
|----------------------------------|------------------------|------------------------|------------------------|------------------------|-----------------------------|-------------------------------|---------------------------|-----------------------------|-----------------------|-----------------------|
| Andean Latin America             | 26.11<br>(25.76-26.46) | 26.99<br>(26.62-27.36) | 17.37<br>(14.36-20.63) | 26.38<br>(23.06-29.81) | 125.06<br>(122.18-127.99)   | 118.46<br>(115.41-121.46)     | 20.21<br>(15.68-25.1)     | 15.55<br>(12.03-19.41)      | 8.27<br>(5.13-12.11)  | 8.62<br>(5.42-12.55)  |
| Caribbean (non-English-speaking) | 25.61<br>(24.81-26.39) | 26.01<br>(25.44-26.58) | 18.56<br>(14.26-23.26) | 30.48<br>(25.67-35.51) | 125.74<br>(121.25-130.2)    | 120.92<br>(116.21-125.7)      | 23.09<br>(16.44-30.84)    | 19.55<br>(14.02-26.2)       | 8.01<br>(4.36-13.03)  | 9.98<br>(5.71-16.26)  |
| Central Latin America            | 27.18<br>(26.83-27.52) | 28.26<br>(27.91-28.62) | 22.22<br>(18.29-26.27) | 31.69<br>(27.5-36.14)  | 126.97<br>(123.71-130.33)   | 122.25<br>(118.92-125.6)      | 22.28<br>(16.26-29.3)     | 17.92<br>(13.01-23.94)      | 10.41<br>(5.9-16.42)  | 11.22<br>(6.54-17.18) |
| Caribbean (English-speaking)     | 26.97<br>(26.23-27.67) | 28.89<br>(28.18-29.61) | 19.21<br>(15.12-23.47) | 34.59<br>(29.57-39.62) | 126.99<br>(123.08-131.08)   | 121.1<br>(116.53-125.57)      | 24.5<br>(18.21-31.54)     | 18.84<br>(13.83-24.74)      | 11.11<br>(6.37-17.28) | 13.64<br>(8.17-21.03) |
| North America                    | 28.77<br>(28.37-29.17) | 28.7<br>(28.26-29.15)  | 34.42<br>(29.89-39.12) | 36.16<br>(31.58-40.65) | 122.98<br>(120.04-125.96)   | 116.64<br>(113.75-119.6)      | 15.48<br>(11.12-20.89)    | 10.71<br>(7.74-14.49)       | 7.96<br>(4.89-12.17)  | 6.26<br>(3.8-9.53)    |
| Southern Latin America           | 26.59<br>(26.17-27.02) | 27.01<br>(26.52-27.51) | 20.05<br>(16.37-24.08) | 26.44<br>(22.27-30.73) | 131.95<br>(128.82-135.31)   | 123.33<br>(120.05-126.75)     | 27.09<br>(20.45-34.22)    | 19.7<br>(14.78-25.4)        | 8.32<br>(4.74-13.36)  | 8.96<br>(5.21-14.17)  |

**Table S4 – Prevalence of obesity (%), prevalence of raised blood pressure (%), and prevalence of diabetes (%), for men and women in 1980 and 2014, as well as the ratio of prevalence between 2014 and 1980**

|                                  | Obesity men |       |                     | Obesity women |       |                     | Raised blood pressure men |       |                     | Raised blood pressure women |       |                     | Diabetes men |                   |                     | Diabetes women |                   |                     |
|----------------------------------|-------------|-------|---------------------|---------------|-------|---------------------|---------------------------|-------|---------------------|-----------------------------|-------|---------------------|--------------|-------------------|---------------------|----------------|-------------------|---------------------|
|                                  | 1980        | 2014  | Ratio of prevalence | 1980          | 2014  | Ratio of prevalence | 1980                      | 2014  | Ratio of prevalence | 1980                        | 2014  | Ratio of prevalence | 1980         | 2014              | Ratio of prevalence | 1980           | 2014              | Ratio of prevalence |
| Andean Latin America             | 4.92        | 17.37 | <b>3.53</b>         | 12.12         | 26.38 | <b>2.18</b>         | 28.92                     | 20.21 | <b>0.70</b>         | 26.70                       | 15.55 | <b>0.58</b>         | 4.96         | 8.27              | <b>1.67</b>         | 5.74           | 8.62              | <b>1.50</b>         |
| Caribbean (non-English-speaking) | 3.94        | 18.56 | <b>4.71</b>         | 12.18         | 30.48 | <b>2.50</b>         | 31.76                     | 23.09 | <b>0.73</b>         | 28.97                       | 19.55 | <b>0.67</b>         | 4.21         | 8.01              | <b>1.90</b>         | 5.11           | 9.98              | <b>1.95</b>         |
| Central Latin America            | 6.69        | 22.22 | <b>3.32</b>         | 14.48         | 31.69 | <b>2.19</b>         | 28.84                     | 22.28 | <b>0.77</b>         | 28.85                       | 17.92 | <b>0.62</b>         | 5.97         | 10.4 <sub>1</sub> | <b>1.74</b>         | 6.13           | 11.2 <sub>2</sub> | <b>1.83</b>         |
| Caribbean (English-speaking)     | 4.76        | 19.21 | <b>4.04</b>         | 14.92         | 34.59 | <b>2.32</b>         | 30.73                     | 24.50 | <b>0.80</b>         | 26.95                       | 18.84 | <b>0.70</b>         | 5.20         | 11.1 <sub>1</sub> | <b>2.14</b>         | 6.40           | 13.6 <sub>4</sub> | <b>2.13</b>         |
| North America                    | 12.38       | 34.42 | <b>2.77</b>         | 15.47         | 36.16 | <b>2.34</b>         | 27.58                     | 15.48 | <b>0.56</b>         | 19.92                       | 10.71 | <b>0.54</b>         | 4.70         | 7.96              | <b>1.69</b>         | 4.29           | 6.26              | <b>1.46</b>         |
| Southern Latin America           | 6.19        | 20.05 | <b>3.24</b>         | 11.46         | 26.44 | <b>2.31</b>         | 37.41                     | 27.09 | <b>0.72</b>         | 33.53                       | 19.70 | <b>0.59</b>         | 5.60         | 8.32              | <b>1.49</b>         | 5.87           | 8.96              | <b>1.53</b>         |

**Table S5 - Age-standardised mean body mass index (BMI, kg/m<sup>2</sup>), prevalence of obesity (%), mean systolic blood pressure (mmHg), prevalence of raised blood pressure (%), and prevalence of diabetes (%) by country in 2014 (95% CrI provided in brackets)**

| Country             | Sex   | Mean BMI               | Obesity Prevalence  | Mean Systolic Blood Pressure | Prevalence Raised Blood Pressure | Prevalence Diabetes |
|---------------------|-------|------------------------|---------------------|------------------------------|----------------------------------|---------------------|
| Argentina           | Men   | 27.81<br>(26.76-28.89) | 27.1<br>(20.7-34.1) | 128.33<br>(122.74-133.94)    | 27.9<br>(19.4-37.7)              | 9.9<br>(5.1-16.3)   |
| Argentina           | Women | 27.57<br>(26.49-28.68) | 29.2<br>(23.1-35.7) | 120.5<br>(114.97-126.23)     | 18.2<br>(12.0-25.2)              | 9.5<br>(5.1-15.1)   |
| Antigua and Barbuda | Men   | 25.65<br>(23.28-28.08) | 11.3<br>(6.3-17.8)  | 129.1<br>(120.59-137.61)     | 26.3<br>(16.4-37.6)              | 9.9<br>(4.4-17.9)   |
| Antigua and Barbuda | Women | 27.7<br>(24.45-30.85)  | 25.8<br>(17.8-34.7) | 123.01<br>(113.58-132.12)    | 20.2<br>(12.3-30.0)              | 13.0<br>(6.3-22.5)  |
| Bahamas             | Men   | 27.12<br>(24.79-29.52) | 24.1<br>(16.3-32.4) | 128.85<br>(120.68-137.03)    | 25.5<br>(16.7-36.0)              | 11.2<br>(5.5-18.7)  |
| Bahamas             | Women | 28.9<br>(25.56-32.12)  | 38.5<br>(29.8-47.4) | 121.12<br>(112.07-130.18)    | 17.2<br>(10.7-25.1)              | 13.7<br>(7.2-22.6)  |
| Belize              | Men   | 27.45<br>(26.13-28.8)  | 16.0<br>(10.3-23.2) | 125.69<br>(118.59-132.62)    | 24.5<br>(16.1-34.5)              | 10.0<br>(4.8-17.1)  |
| Belize              | Women | 30.51<br>(29.05-31.92) | 31.5<br>(23.8-39.6) | 118.74<br>(111.11-126.22)    | 21.1<br>(13.6-29.9)              | 15.2<br>(8.2-24.5)  |
| Bermuda             | Men   | 27.58<br>(25.19-30.05) | 28.7<br>(20.4-37.6) | 128.99<br>(120.52-137.48)    | 26.5<br>(16.6-37.4)              | 14.2<br>(7.1-23.9)  |

|          |       |                        |                     |                           |                     |                    |
|----------|-------|------------------------|---------------------|---------------------------|---------------------|--------------------|
| Bermuda  | Women | 29.31<br>(26.03-32.63) | 42.4<br>(33.4-51.6) | 121.31<br>(112.04-130.33) | 17.3<br>(10.2-26.0) | 15.4<br>(7.9-25.7) |
| Bolivia  | Men   | 25.21<br>(23.68-26.7)  | 14.1<br>(8.3-21.2)  | 124.37<br>(117-131.77)    | 19.9<br>(11.9-19.5) | 7.0<br>(2.9-12.4)  |
| Bolivia  | Women | 27.66<br>(26.45-28.89) | 25.5<br>(18.7-32.7) | 120.07<br>(111.92-128.34) | 16.3<br>(10.0-24.3) | 8.9<br>(4.1-15.1)  |
| Brazil   | Men   | 26.21<br>(25.74-26.66) | 18.2<br>(14.2-22.6) | 133.17<br>(129.51-137.2)  | 27.1<br>(19.5-35.1) | 7.8<br>(4.1-13.3)  |
| Brazil   | Women | 26.78<br>(26.22-27.32) | 25.4<br>(20.9-30.2) | 124.3<br>(120.38-128.35)  | 20.3<br>(14.5-26.9) | 8.7<br>(4.6-14.4)  |
| Barbados | Men   | 26.34<br>(25.44-27.25) | 14.2<br>(9.3-20.4)  | 129.76<br>(124.2-135.34)  | 27.0<br>(17.9-37.2) | 10.5<br>(5.1-17.9) |
| Barbados | Women | 29.23<br>(28.18-30.27) | 31.2<br>(24.1-38.8) | 124.73<br>(119.03-130.17) | 21.7<br>(14.3-30.2) | 13.7<br>(7.2-22.8) |
| Canada   | Men   | 27.44<br>(26.99-27.89) | 29.2<br>(24.4-34.2) | 118.82<br>(112.74-124.39) | 16.0<br>(10.0-23.0) | 6.2<br>(3.3-10.3)  |
| Canada   | Women | 26.7<br>(26.18-27.21)  | 29.3<br>(24.7-34.2) | 111.73<br>(105.79-117.53) | 11.1<br>(7.0-16.0)  | 4.8<br>(2.5-7.9)   |
| Chile    | Men   | 27.78<br>(26.98-28.6)  | 24.7<br>(18.7-31.0) | 128.32<br>(123.21-133.52) | 25.7<br>(17.6-34.5) | 10.2<br>(5.5-16.2) |
| Chile    | Women | 28.18<br>(27.23-29.14) | 31.2<br>(25.1-37.7) | 119.81<br>(114.68-124.86) | 16.9<br>(11.4-23.6) | 10.8<br>(6.1-17.0) |



|                    |       |                        |                     |                           |                     |                    |
|--------------------|-------|------------------------|---------------------|---------------------------|---------------------|--------------------|
| Colombia           | Men   | 25.76<br>(25.08-26.45) | 17.3<br>(12.4-22.6) | 126.25<br>(120.74-132.01) | 21.7<br>(14.5-30.2) | 8.3<br>(4.3-13.8)  |
| Colombia           | Women | 26.63<br>(25.87-27.38) | 26.7<br>(21.5-32.1) | 119.15<br>(113.34-125.09) | 17.2<br>(11.2-23.8) | 8.7<br>(4.6-14.1)  |
| Costa Rica         | Men   | 26.77<br>(26.08-27.48) | 20.3<br>(14.6-26.6) | 126.22<br>(122.29-130.26) | 1.3<br>(14.3-29.3)  | 8.8<br>(4.6-14.7)  |
| Costa Rica         | Women | 27.91<br>(27.2-28.61)  | 30.1<br>(24.0-36.7) | 120.27<br>(116.32-124.27) | 16.6<br>(11.2-22.9) | 8.9<br>(4.8-14.4)  |
| Cuba               | Men   | 25.21<br>(24.37-26.05) | 18.5<br>(13.0-24.4) | 123.52<br>(118.23-128.85) | 21.2<br>(13.6-30.4) | 7.3<br>(3.5-12.7)  |
| Cuba               | Women | 26.09<br>(25.16-27)    | 30.6<br>(24.1-37.6) | 117.76<br>(112.43-123.24) | 17.2<br>(11.0-24.9) | 9.6<br>(4.8-16.6)  |
| Dominica           | Men   | 24.91<br>(23.72-26.11) | 19.4<br>(12.8-26.9) | 131.9<br>(125.27-138.69)  | 25.9<br>(17.1-36.1) | 8.5<br>(4.1-14.9)  |
| Dominica           | Women | 29.02<br>(27.65-30.42) | 35.7<br>(27.8-43.7) | 126.56<br>(119.62-133.69) | 19.7<br>(12.8-27.7) | 13.6<br>(7.4-22.8) |
| Dominican Republic | Women | 27.36<br>(26.46-28.24) | 33.9<br>(27.1-41.0) | 122.36<br>(114.49-130.71) | 19.5<br>(12.7-28.3) | 11.4<br>(6.1-19.6) |
| Dominican Republic | Men   | 25.55<br>(24.85-26.28) | 20.1<br>(14.0-26.7) | 127.48<br>(119.87-135.23) | 24.1<br>(15.4-34.2) | 8.6<br>(4.1-15.1)  |
| Ecuador            | Men   | 26.52<br>(25.74-27.28) | 14.5<br>(9.2-21.1)  | 124.38<br>(119.19-129.82) | 19.9<br>(12.1-29.0) | 7.5<br>(3.1-13.2)  |

|           |       |                        |                     |                           |                     |                    |
|-----------|-------|------------------------|---------------------|---------------------------|---------------------|--------------------|
| Ecuador   | Women | 27.8<br>(26.88-28.74)  | 24.7<br>(18.1-31.8) | 119.15<br>(113.84-124.58) | 16.2<br>(10.1-23.7) | 8.5<br>(3.7-14.9)  |
| Grenada   | Women | 28.73<br>(27.57-29.85) | 28.9<br>(21.1-37.1) | 126.61<br>(120.7-132.56)  | 21.6<br>(14.2-30.3) | 13.3<br>(6.7-22.1) |
| Grenada   | Men   | 25.1<br>(24.2-26.04)   | 12.9<br>(7.8-19.3)  | 131.85<br>(125.99-137.7)  | 26.8<br>(18.0-37.0) | 8.8<br>(4.0-15.6)  |
| Guatemala | Men   | 25.67<br>(24.26-27.02) | 14.6<br>(9.3-20.7)  | 124.94<br>(117.99-132.08) | 22.0<br>(14.1-31.5) | 8.9<br>(4.3-15.3)  |
| Guatemala | Women | 27.28<br>(26.55-28.01) | 26.2<br>(20.1-32.7) | 119.86<br>(112.43-127.61) | 20.5<br>(13.1-28.8) | 10.4<br>(5.4-17.2) |
| Guyana    | Men   | 24.99<br>(23.95-26.03) | 12.1<br>(7.1-18.3)  | 127.29<br>(119.07-135.53) | 24.4<br>(15.3-34.9) | 9.1<br>(4.1-16.3)  |
| Guyana    | Women | 27.68<br>(26.39-28.99) | 26.8<br>(19.4-34.7) | 123.86<br>(114.9-132.9)   | 21.4<br>(13.5-30.7) | 12.6<br>(6.3-21.5) |
| Honduras  | Men   | 25.84<br>(24.12-27.55) | 15.1<br>(9.6-21.7)  | 126.65<br>(119.31-134.22) | 22.6<br>(14.5-31.6) | 8.5<br>(4.2-14.4)  |
| Honduras  | Women | 27.54<br>(26.68-28.39) | 26.5<br>(20.3-33.3) | 120.84<br>(112.79-128.72) | 20.4<br>(13.2-28.8) | 10.0<br>(5.2-16.6) |
| Haiti     | Men   | 26.37<br>(24.04-28.74) | 16.8<br>(10.6-24.4) | 127.5<br>(119.13-135.93)  | 25.4<br>(16.2-36.1) | 8.6<br>(4.0-15.5)  |
| Haiti     | Women | 24.15<br>(23.15-25.12) | 26.4<br>(20.0-33.3) | 124.34<br>(114.99-133.39) | 24.0<br>(15.6-33.8) | 8.8<br>(4.3-15.9)  |

|                       |       |                        |                     |                           |                     |                    |
|-----------------------|-------|------------------------|---------------------|---------------------------|---------------------|--------------------|
| Jamaica               | Men   | 25.73<br>(24.68-26.74) | 14.7<br>(10.0-20.4) | 126.39<br>(120.49-132.52) | 24.6<br>(16.2-34.1) | 9.3<br>(4.5-16.0)  |
| Jamaica               | Women | 29.54<br>(28.4-30.72)  | 33.4<br>(26.6-40.3) | 123.4<br>(117.23-129.72)  | 19.4<br>(12.6-27.4) | 14.4<br>(7.8-23.3) |
| Saint Kitts and Nevis | Men   | 28.15<br>(26.54-29.81) | 14.7<br>(9.1-21.7)  | 131.28<br>(124.59-138.19) | 28.0<br>(18.4-38.6) | 12.7<br>(6.0-21.6) |
| Saint Kitts and Nevis | Women | 30.59<br>(28.67-32.5)  | 29.9<br>(21.9-38.4) | 127.01<br>(119.73-134.47) | 22.7<br>(14.8-31.9) | 16.3<br>(8.4-26.6) |
| Saint Lucia           | Men   | 29.33<br>(28.46-30.17) | 11.5<br>(6.8-17.3)  | 131.31<br>(125.84-136.81) | 29.8<br>(19.9-40.8) | 13.7<br>(6.1-24.1) |
| Saint Lucia           | Women | 30.2<br>(29.14-31.26)  | 26.6<br>(19.4-34.4) | 125.52<br>(119.76-131.16) | 24.3<br>(15.9-34.4) | 15.1<br>(7.2-25.9) |
| Mexico                | Men   | 27.5<br>(27.13-27.86)  | 24.0<br>(19.3-28.8) | 127.37<br>(123.48-131.42) | 22.4<br>(15.4-30.5) | 10.9<br>(5.8-17.7) |
| Mexico                | Women | 28.44<br>(28.01-28.87) | 32.9<br>(28.0-38.1) | 122.96<br>(119.02-126.92) | 17.6<br>(12.0-24.4) | 11.5<br>(6.4-18.3) |
| Nicaragua             | Men   | 26.53<br>(24.84-28.29) | 17.5<br>(11.4-24.4) | 126.81<br>(119.28-134.19) | 21.7<br>(13.9-30.8) | 9.2<br>(4.6-15.7)  |
| Nicaragua             | Women | 27.94<br>(26.75-29.13) | 28.9<br>(22.5-35.6) | 122.47<br>(114.69-130.35) | 20.1<br>(13.0-28.4) | 11.0<br>(5.8-17.8) |
| Panama                | Men   | 26.19<br>(25.02-27.37) | 17.4<br>(11.9-23.8) | 127.83<br>(121.73-133.75) | 22.4<br>(15.2-31.2) | 8.9<br>(4.6-14.7)  |

|             |       |                        |                     |                           |                     |                    |
|-------------|-------|------------------------|---------------------|---------------------------|---------------------|--------------------|
| Panama      | Women | 27.67<br>(26.39-28.93) | 27.6<br>(21.1-34.6) | 121.72<br>(115.33-127.85) | 17.5<br>(11.5-24.6) | 9.8<br>(5.3-15.6)  |
| Peru        | Men   | 26.11<br>(25.73-26.48) | 14.9<br>(10.8-19.2) | 123.94 (121.27-126.62)    | 16.4 (11.4-22.1)    | 7.2 (3.2-12.6)     |
| Peru        | Women | 27.07<br>(26.71-27.44) | 24.2<br>(20.1-28.7) | 115.87<br>(113.27-118.59) | 11.6<br>(8.0-15.7)  | 8.1<br>(3.8-13.7)  |
| Puerto Rico | Men   | 28.33<br>(27.05-29.6)  | 27.9<br>(20.6-35.8) | 125.57<br>(118.36-132.68) | 22.6<br>(14.3-32.3) | 13.0<br>(6.6-21.6) |
| Puerto Rico | Women | 28.53<br>(27.35-29.74) | 40.8<br>(33.4-48.4) | 117.89<br>(109.9-125.92)  | 15.9<br>(9.8-23.8)  | 13.4<br>(7.1-22.4) |
| Paraguay    | Men   | 26.48<br>(23.97-29)    | 16.7<br>(10.4-24.5) | 129.35<br>(120.99-137.81) | 28.1<br>(18.6-38.8) | 8.0<br>(3.8-14.0)  |
| Paraguay    | Women | 26.88<br>(23.47-30.2)  | 23.3<br>(15.7-31.7) | 122.57<br>(113.37-131.28) | 21.5<br>(13.8-30.7) | 8.3<br>(4.2-14.1)  |
| El Salvador | Men   | 26.83<br>(25.13-28.65) | 18.4<br>(12.0-25.6) | 124.22<br>(116.8-131.59)  | 20.6<br>(12.9-29.1) | 9.3<br>(4.8-15.6)  |
| El Salvador | Women | 28.28<br>(27.14-29.41) | 28.8<br>(22.2-35.9) | 118.66<br>(110.53-126.59) | 17.4<br>(10.9-25.2) | 10.7<br>(5.7-17.1) |
| Suriname    | Men   | 25.38<br>(24.09-26.64) | 18.6<br>(12.4-25.7) | 127.72<br>(119.54-136.05) | 24.8<br>(16.0-35.5) | 10.9<br>(5.5-18.3) |
| Suriname    | Women | 27.76<br>(26.1-29.34)  | 34.0<br>(26.5-41.7) | 122.89<br>(113.66-131.76) | 20.2<br>(13.0-28.7) | 13.5<br>(7.3-22.6) |

|                                  |       |                        |                     |                           |                     |                    |
|----------------------------------|-------|------------------------|---------------------|---------------------------|---------------------|--------------------|
| Trinidad and Tobago              | Men   | 26.6<br>(25-28.13)     | 10.3<br>(5.7-17.0)  | 129.08<br>(121.42-136.64) | 27.4<br>(17.4-39.1) | 10.4<br>(4.5-19.1) |
| Trinidad and Tobago              | Women | 28.62<br>(26.69-30.44) | 25.6<br>(17.7-34.3) | 122.9<br>(114.67-130.95)  | 23.7<br>(15.0-33.8) | 13.0<br>(6.0-22.7) |
| Uruguay                          | Men   | 27.28<br>(26.29-28.24) | 24.7<br>(18-0.32)   | 127.04<br>(121.91-131.97) | 25.3<br>(17.2-34.0) | 9.1<br>(4.8-14.9)  |
| Uruguay                          | Women | 27.38<br>(26.26-28.5)  | 30.9<br>(23.9-38.3) | 120.47<br>(115.11-125.83) | 17.2<br>(11.4-24.1) | 9.8<br>(5.3-15.9)  |
| United States of America         | Men   | 28.93<br>(28.49-29.36) | 35.0<br>(30.1-40.1) | 123.46<br>(120.36-126.68) | 15.4<br>(10.8-21.3) | 8.2<br>(4.9-12.7)  |
| United States of America         | Women | 28.92<br>(28.45-29.42) | 36.9<br>(32.1-41.8) | 117.2<br>(114.01-120.45)  | 10.7<br>(7.5-14.7)  | 6.4<br>(3.8-9.9)   |
| Saint Vincent and the Grenadines | Men   | 26.24<br>(23.94-28.62) | 15.9<br>(9.8-23.2)  | 128.76<br>(120.45-136.81) | 26.0<br>(16.9-36.0) | 9.3<br>(4.5-16.3)  |
| Saint Vincent and the Grenadines | Women | 28.19<br>(24.96-31.41) | 30.9<br>(22.7-39.7) | 122.88<br>(114-131.7)     | 20.9<br>(13.4-30.1) | 11.8<br>(6.1-19.9) |
| Venezuela                        | Women | 26.89<br>(26.19-27.59) | 29.0<br>(23.2-35.3) | 118.86<br>(112.91-124.5)  | 16.1<br>(10.5-22.7) | 9.0<br>(4.8-14.4)  |
| Venezuela                        | Men   | 26.69<br>(26.06-27.3)  | 22.3<br>(16.6-28.3) | 124.86<br>(119.11-130.32) | 21.9<br>(14.6-30.3) | 9.9<br>(5.3-15.7)  |

**Figure S1 – Mean body mass index and systolic blood pressure by sub-regions in men**

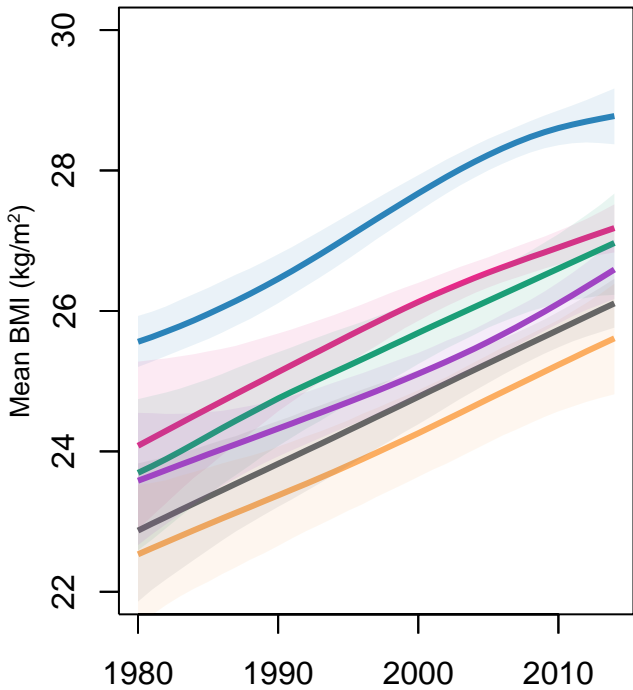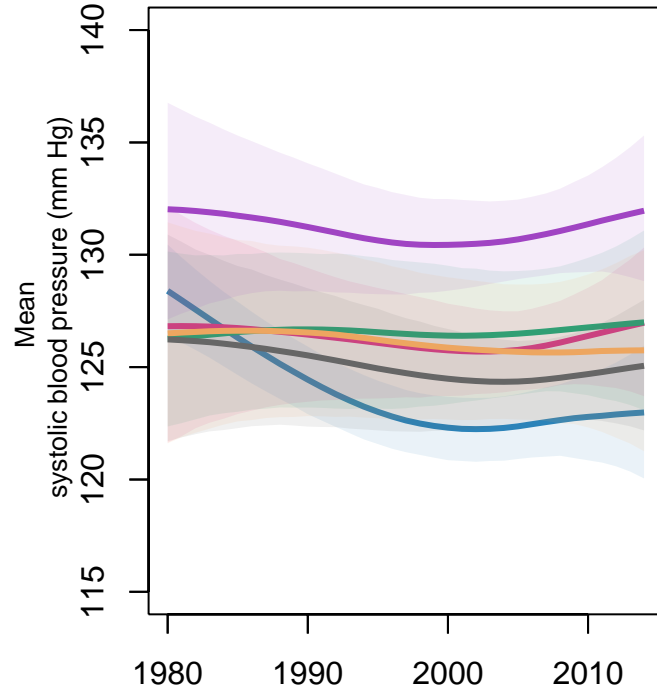

- North America
- Central Latin America
- English-speaking Caribbean
- non-English-speaking Caribbean
- Andean Latin America
- Southern Latin America

**Figure S2 – Mean body mass index and systolic blood pressure by sub-regions in women**



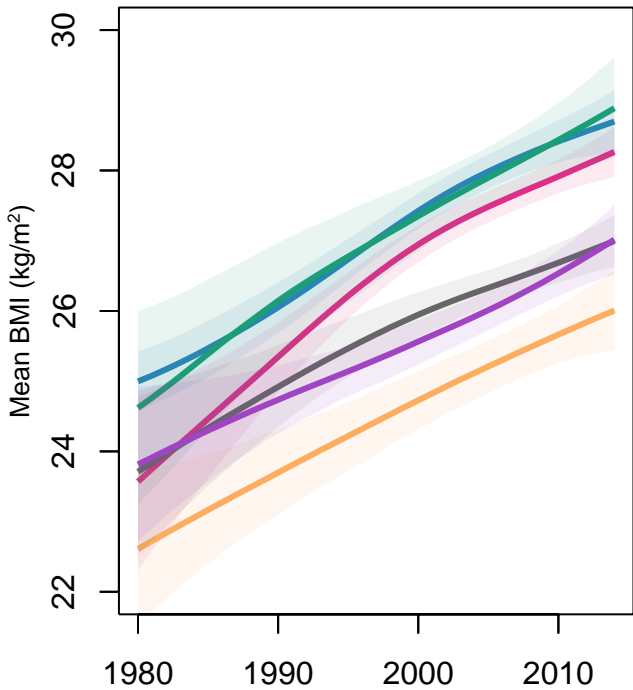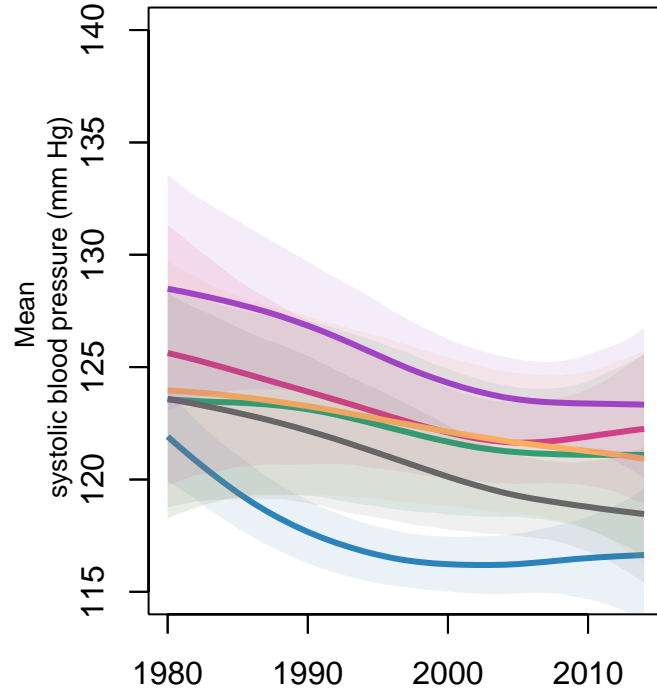

- North America
- Central Latin America
- English-speaking Caribbean
- non-English-speaking Caribbean
- Andean Latin America
- Southern Latin America

**Figure S3 – Heatmap of age-standardised prevalence of obesity, raised blood pressure (RBP), and diabetes (DM) by country in (A) men and (B) women in 1980. Countries ranked by prevalence of obesity**

A

|                                  | Obesity (%) | Raised blood pressure (%) | Diabetes (%) |
|----------------------------------|-------------|---------------------------|--------------|
| Bermuda                          | 13.4        | 47.6                      | 10.6         |
| United States of America         | 12.6        | 27                        | 4.7          |
| Argentina                        | 11          | 43                        | 7.4          |
| Canada                           | 10.7        | 33.3                      | 5            |
| Chile                            | 9.9         | 37.9                      | 7.2          |
| Uruguay                          | 9.6         | 43.2                      | 7.5          |
| Venezuela                        | 7.9         | 34.9                      | 7            |
| Mexico                           | 7.7         | 29.9                      | 6.5          |
| Bahamas                          | 7.5         | 36.9                      | 6.3          |
| Puerto Rico                      | 6.9         | 33.5                      | 6.8          |
| Suriname                         | 5.1         | 33.1                      | 6.1          |
| Belize                           | 4.9         | 33.2                      | 5.4          |
| Cuba                             | 4.8         | 36.2                      | 5            |
| Nicaragua                        | 4.8         | 28.6                      | 5.1          |
| Colombia                         | 4.5         | 29.2                      | 4.4          |
| Peru                             | 4.3         | 26.7                      | 4.9          |
| Brazil                           | 4.3         | 35.6                      | 4.8          |
| Panama                           | 4.2         | 27.8                      | 4.5          |
| Barbados                         | 4.1         | 33                        | 5            |
| El Salvador                      | 4           | 25.4                      | 4.9          |
| Costa Rica                       | 3.8         | 26.3                      | 4.2          |
| Dominican Republic               | 3.7         | 28.6                      | 3.5          |
| Dominica                         | 3.7         | 30.7                      | 4            |
| Saint Kitts and Nevis            | 3.7         | 29.9                      | 5.4          |
| Paraguay                         | 3.6         | 30                        | 3.4          |
| Ecuador                          | 3.3         | 23.6                      | 3.7          |
| Guatemala                        | 3.3         | 24.8                      | 4.4          |
| Jamaica                          | 3.2         | 30.3                      | 3.9          |
| Antigua and Barbuda              | 3           | 27.5                      | 3.9          |
| Saint Vincent and the Grenadines | 3           | 28                        | 4.1          |
| Grenada                          | 2.9         | 28                        | 3.4          |
| Bolivia                          | 2.9         | 25.8                      | 4.1          |
| Honduras                         | 2.9         | 24.1                      | 3.7          |
| Guyana                           | 2.7         | 26.8                      | 3.6          |
| Saint Lucia                      | 2.7         | 26.2                      | 3.4          |
| Trinidad and Tobago              | 2.1         | 23.6                      | 3.2          |
| Haiti                            | 2           | 24.7                      | 2.8          |

B

|                                  | Obesity (%) | Raised blood pressure (%) | Diabetes (%) |
|----------------------------------|-------------|---------------------------|--------------|
| Bermuda                          | 31.2        | 40.4                      | 11.2         |
| Bahamas                          | 21.1        | 31.5                      | 8            |
| Puerto Rico                      | 18.6        | 30                        | 7.3          |
| Uruguay                          | 16.8        | 35.9                      | 7.3          |
| Chile                            | 16.8        | 32.9                      | 7.8          |
| Suriname                         | 16.4        | 30.5                      | 7.8          |
| Mexico                           | 15.9        | 30.2                      | 6.5          |
| Venezuela                        | 15.8        | 32.5                      | 6.9          |
| United States of America         | 15.8        | 19.5                      | 4.3          |
| Belize                           | 15.5        | 29.3                      | 7.6          |
| Argentina                        | 15.4        | 34.5                      | 6.1          |
| Cuba                             | 15          | 31.7                      | 6.2          |
| Barbados                         | 14.2        | 27.3                      | 7.2          |
| Jamaica                          | 13.9        | 26.1                      | 5.7          |
| Dominica                         | 13.4        | 27.2                      | 6.3          |
| Canada                           | 12.7        | 24.1                      | 4            |
| Dominican Republic               | 12.4        | 27.6                      | 4.6          |
| Nicaragua                        | 12.3        | 27.7                      | 5.8          |
| Saint Kitts and Nevis            | 12.3        | 24.7                      | 7.2          |
| Colombia                         | 11.9        | 27                        | 5.6          |
| Peru                             | 11.4        | 24.2                      | 5.9          |
| Panama                           | 10.8        | 24.7                      | 5.1          |
| Grenada                          | 10.8        | 24.2                      | 5.1          |
| Antigua and Barbuda              | 10.7        | 22.2                      | 5.6          |
| Saint Vincent and the Grenadines | 10.6        | 24.3                      | 5.3          |
| El Salvador                      | 10.4        | 24.1                      | 5.5          |
| Guyana                           | 10          | 23.5                      | 5            |
| Saint Lucia                      | 9.8         | 22.5                      | 4.8          |
| Costa Rica                       | 9.7         | 23.7                      | 4.4          |
| Ecuador                          | 9.5         | 22.4                      | 4.5          |
| Brazil                           | 9.5         | 33.4                      | 5.6          |
| Guatemala                        | 9.5         | 24.7                      | 5            |
| Bolivia                          | 9.1         | 23.9                      | 4.9          |
| Honduras                         | 8.5         | 23.6                      | 3.9          |
| Trinidad and Tobago              | 7.5         | 19.9                      | 4.9          |
| Paraguay                         | 7.1         | 25.9                      | 3.6          |
| Haiti                            | 6           | 24.5                      | 3            |

**Figure S4 – Age standardised prevalence of obesity vs. age standardised prevalence of raised blood pressure and age standardised prevalence of diabetes by sex, (A) 1980 and (B) 2014**

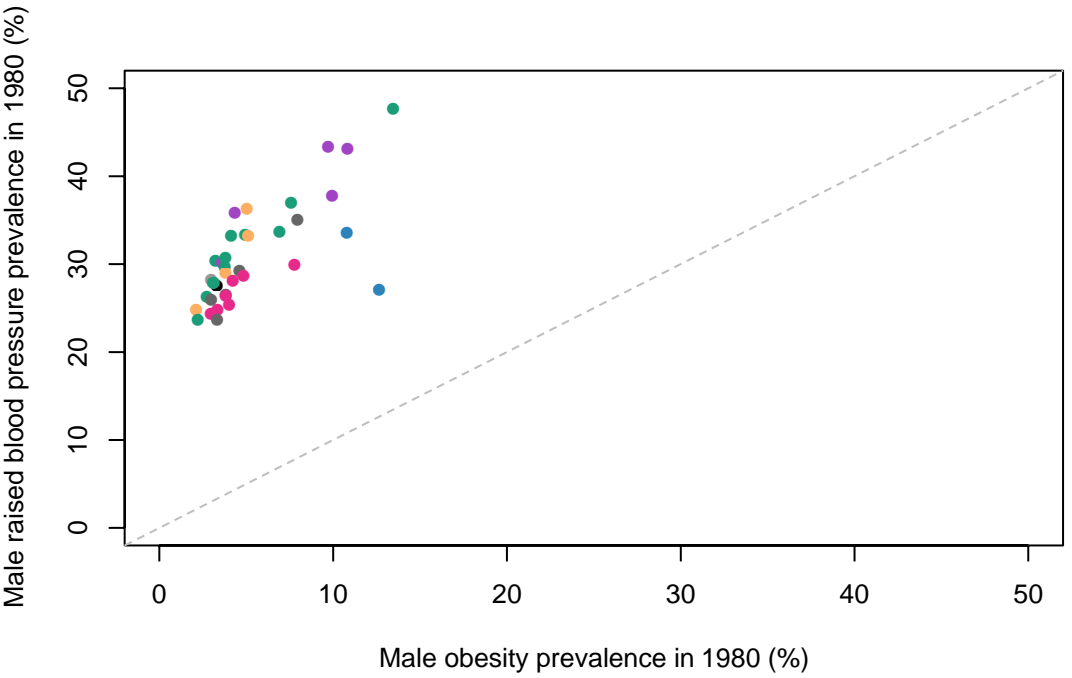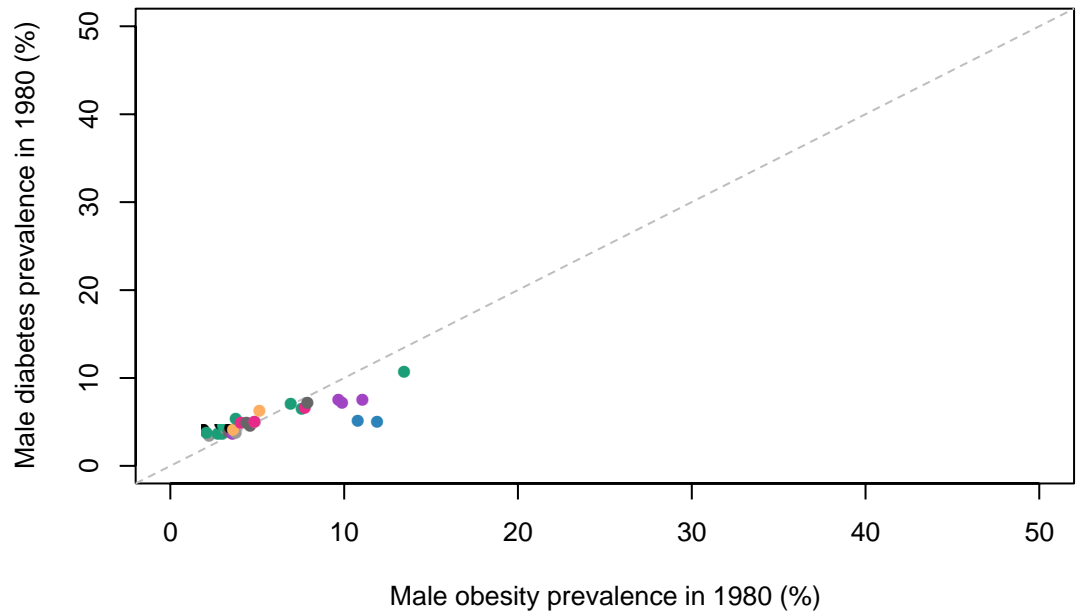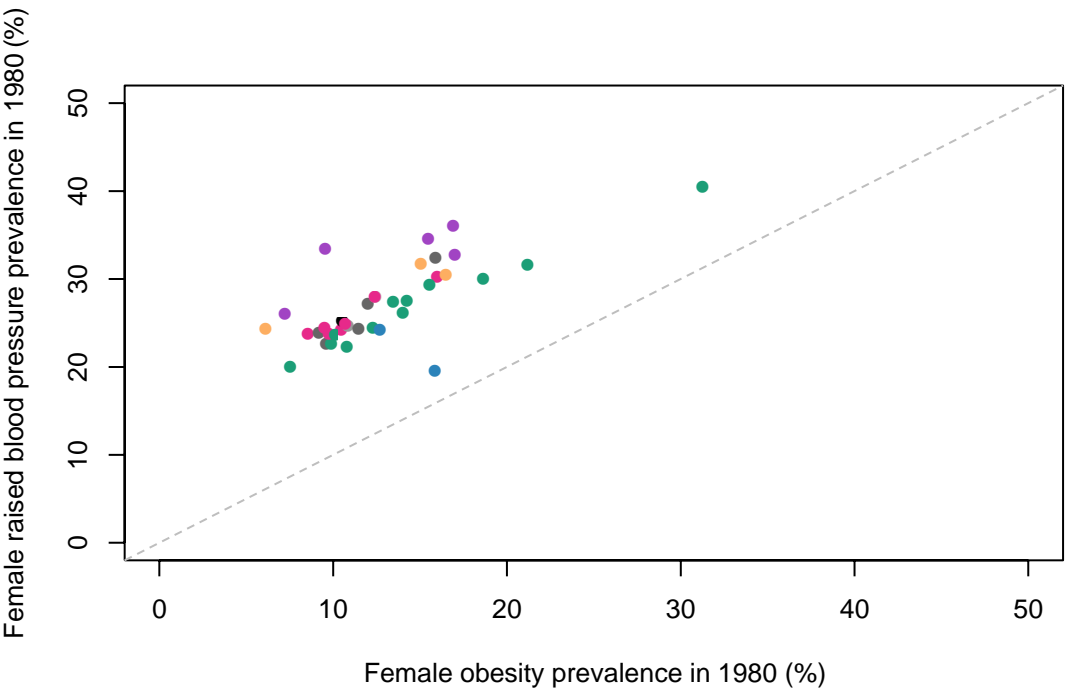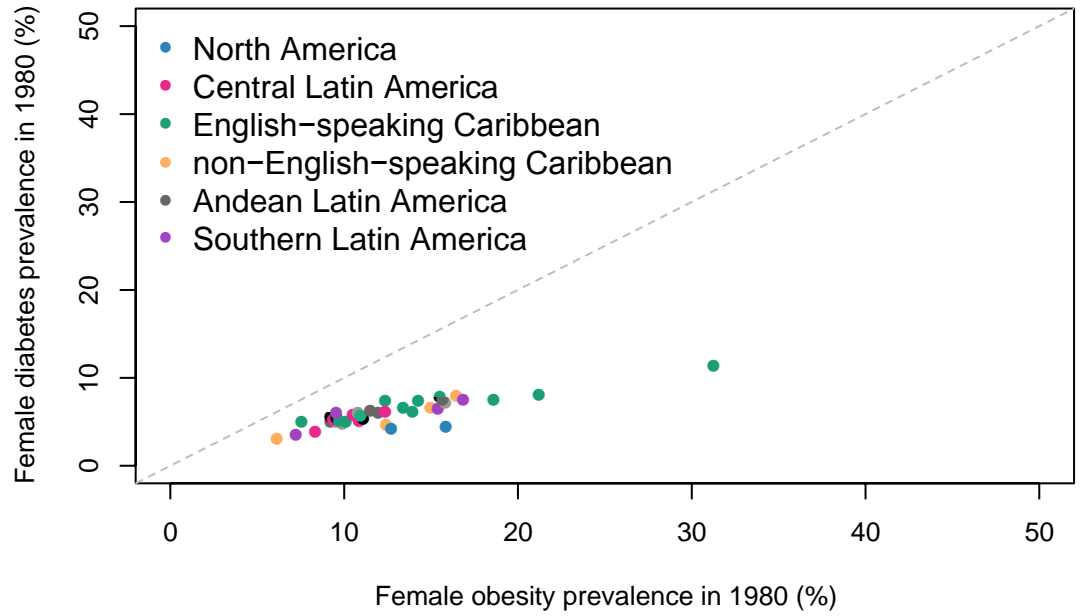

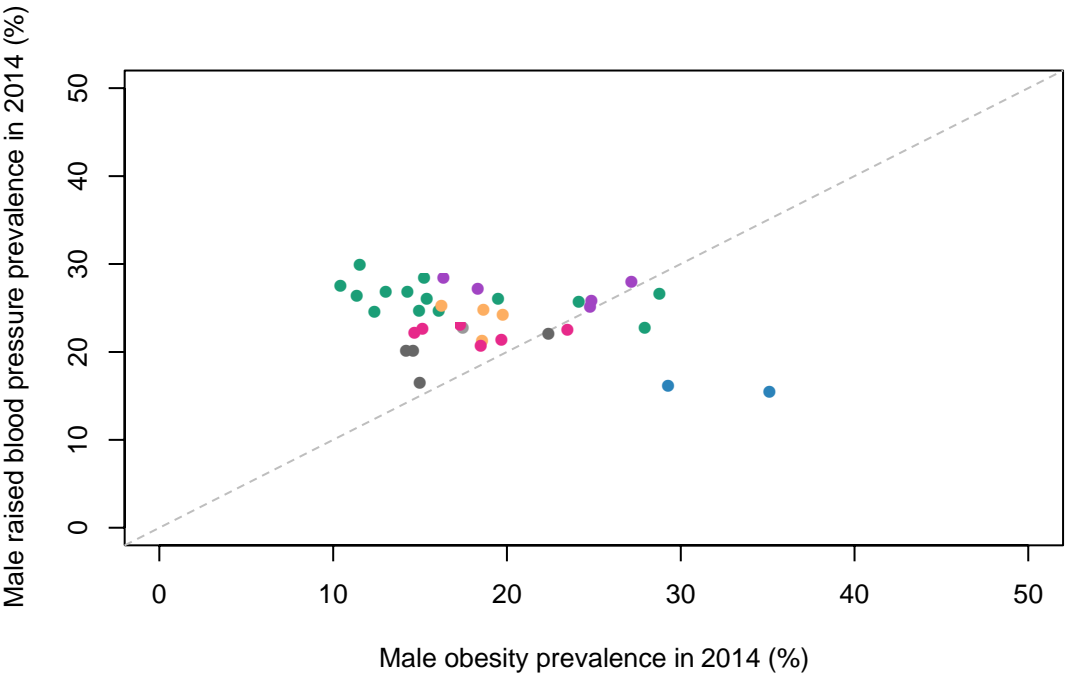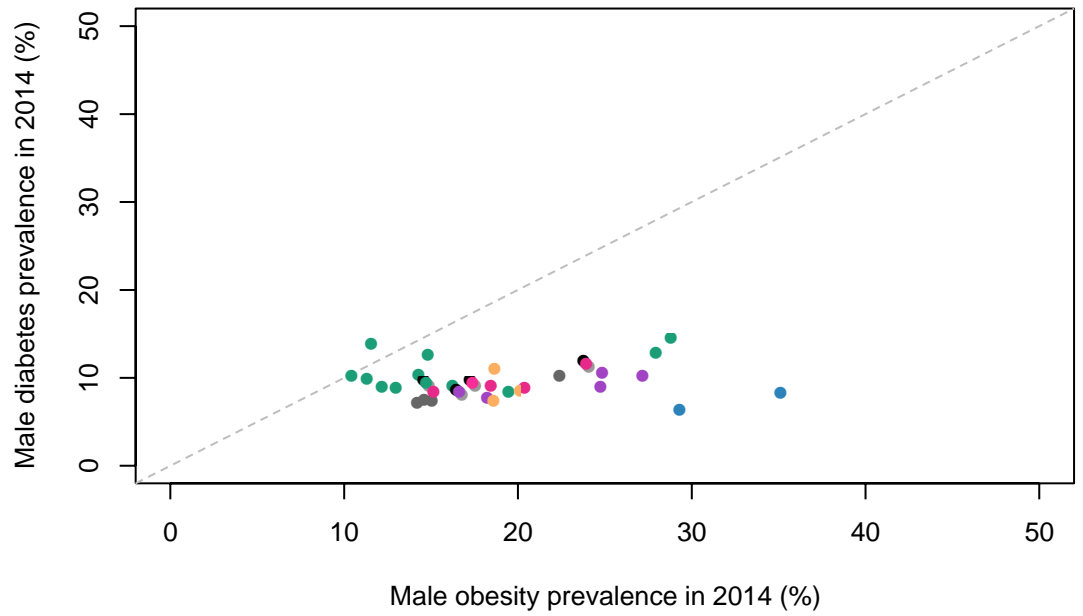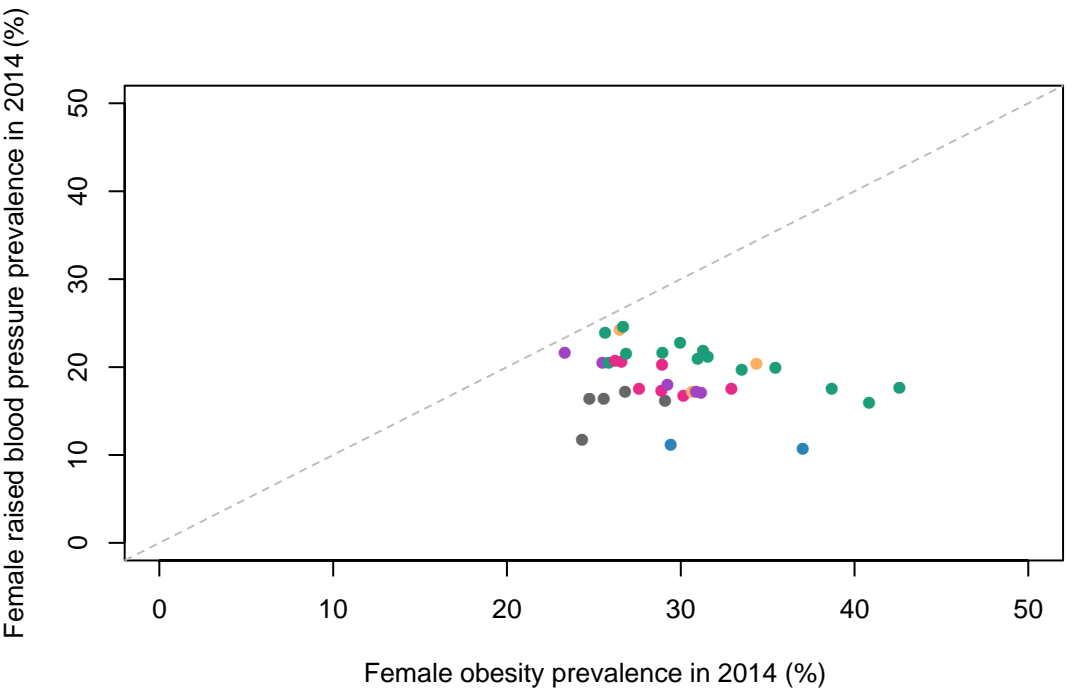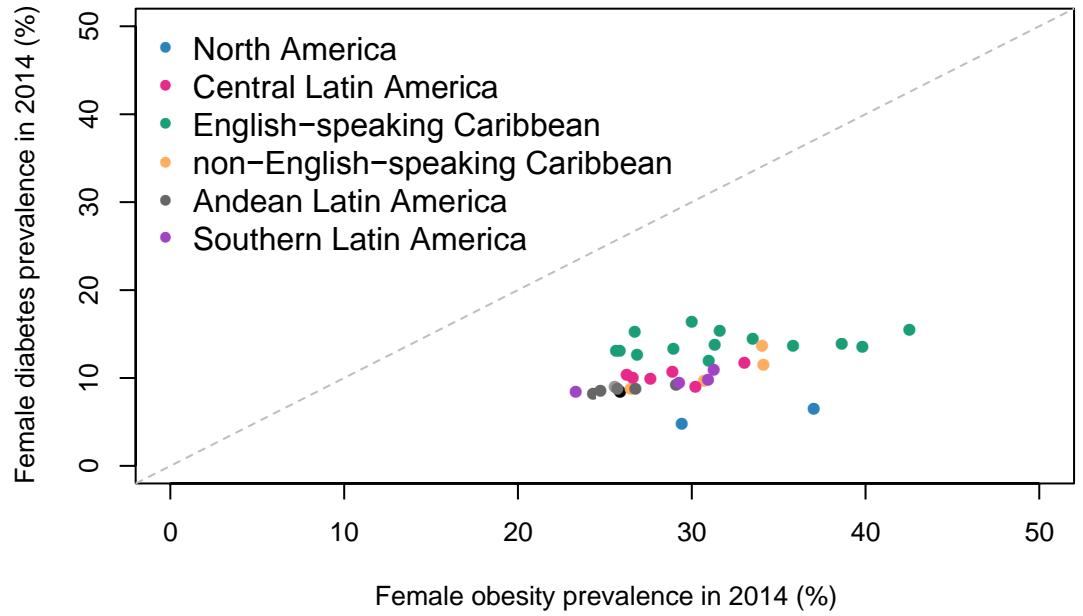

Supplement: mmc1.pdf [file mmc1.pdf]
